# Supplementary figures and images for: Encapsulation and release of curcumin using an intact milk fat globule delivery system
Source: Royal Society of Chemistry journal article supplement (doi:10.1039/c9fo00489k), 2019-01-01

## Bright-field

## Fluorescence

OG-DHPE probed-  
MFGM, 0% v/v ethanol

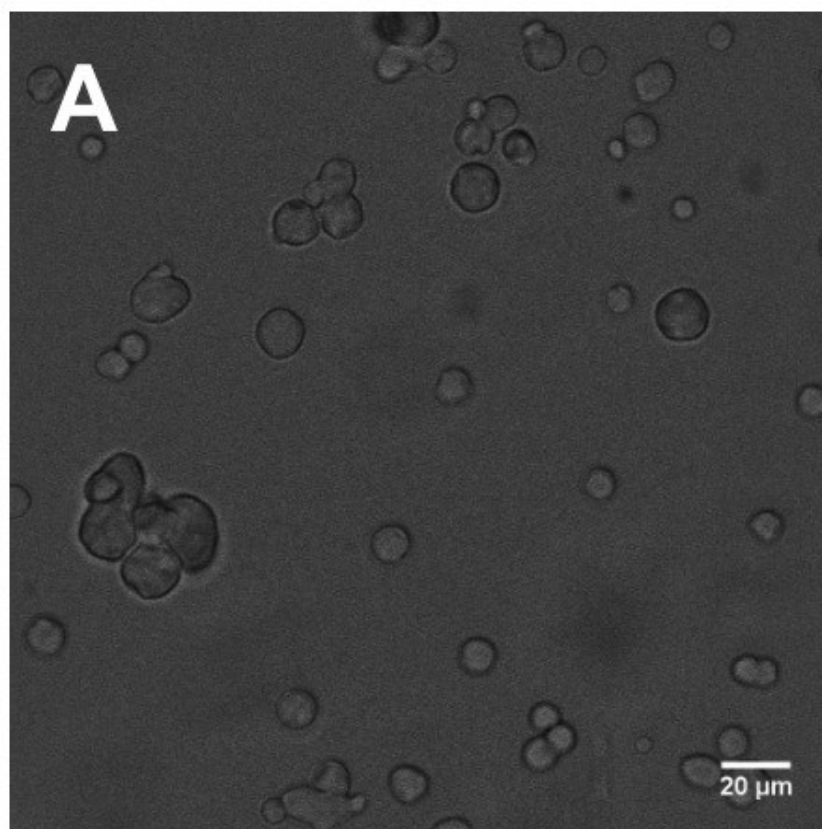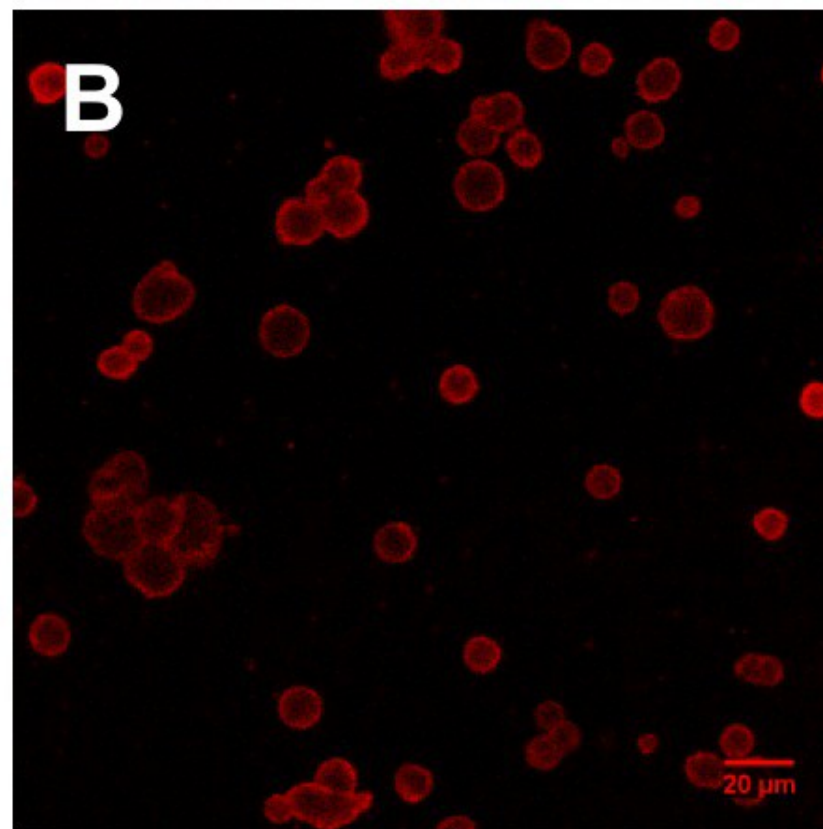

OG-DHPE probed-  
MFGM, 10% v/v ethanol

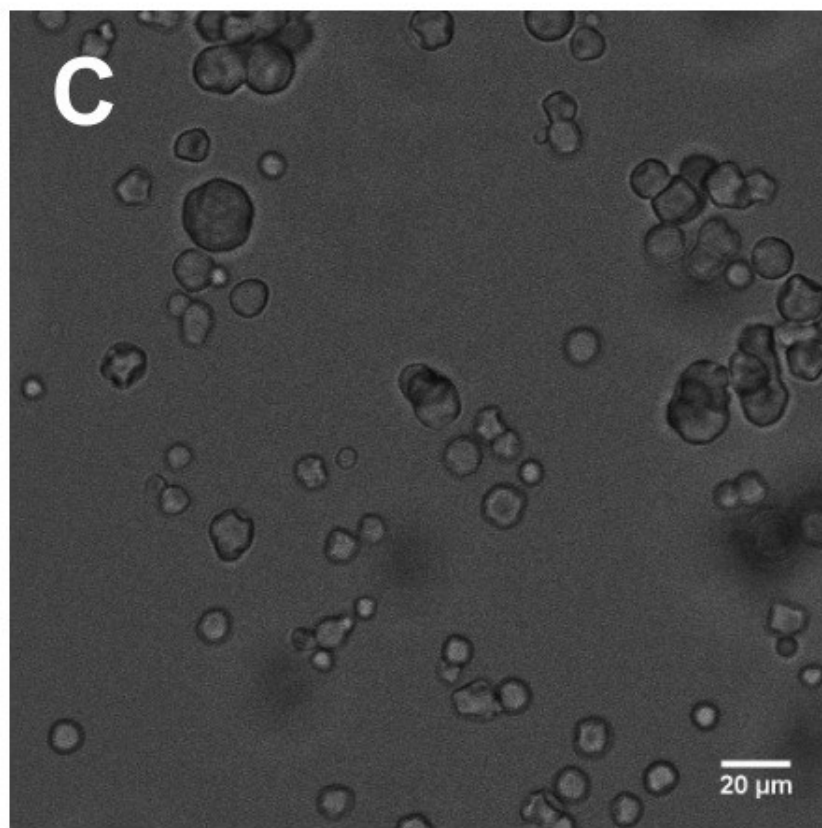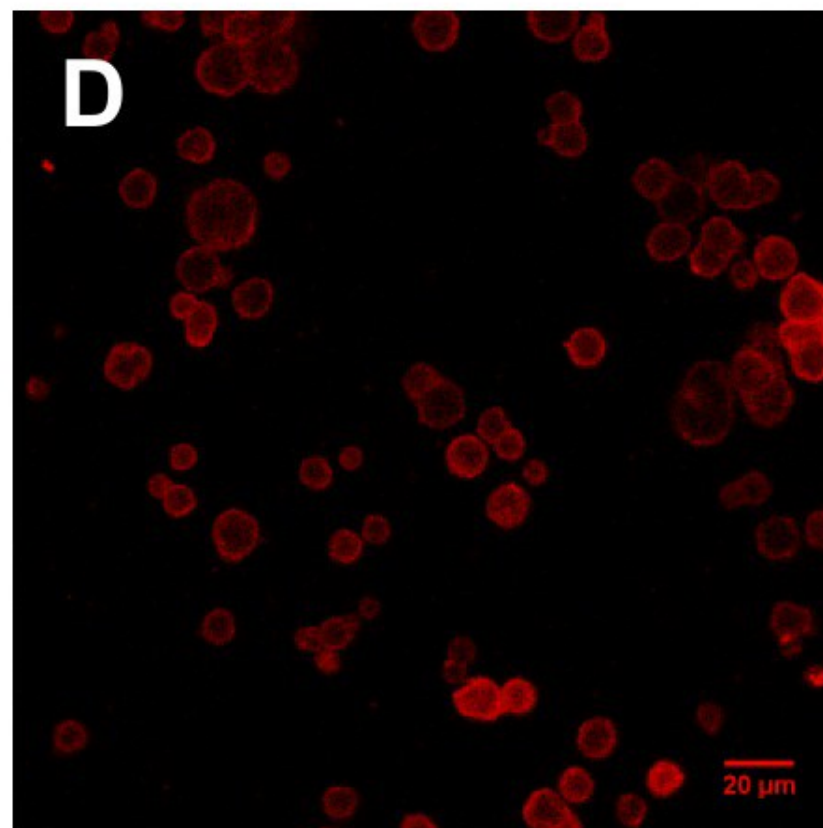

Supplement: c9fo00489k2.pdf [file c9fo00489k2.pdf]
